# Supplementary material
Source: publisher figshare collection journal article supplement (https://acs.figshare.com/ndownloader/files/28061732)
Supplement: Supplementary file 1 [file 28061732]

## ***Supporting Information***

# **Electron Beam Irradiation of Lead Halide Perovskite Solar Cells: Dedoping of Organic Hole Transport Material Despite Hardness of the Perovskite Layer**

*Yoshiyuki Murakami,<sup>†</sup> Fumitaka Ishiwari,<sup>†,‡</sup> Kazumasa Okamoto,<sup>§</sup> Takahiro Kozawa,<sup>§</sup> and Akinori Saeki<sup>\*,†,‡</sup>*

<sup>†</sup>Department of Applied Chemistry, Graduate School of Engineering, Osaka University, 2-1 Yamadaoka, Suita, Osaka 565-0871, Japan.

<sup>‡</sup>Frontier Research Base for Global Young Researchers, Graduate School of Engineering, Osaka University, Suita 565-0871, Japan.

<sup>§</sup>The Institute of Scientific and Industrial Research (ISIR), Osaka University, 8-1 Mihogaoka, Ibaraki, Osaka 567-0047, Japan.

<sup>#</sup>Innovative Catalysis Science Division, Institute for Open and Transdisciplinary Research Initiatives (ICS-OTRI), Osaka University, 1-1 Yamadaoka, Suita, Osaka 565-0871, Japan.

### **AUTHOR INFORMATION**

#### **Corresponding Author**

\*sacki@chem.eng.osaka-u.ac.jp (A.S.)

This supporting information presents the following contents.

**Supporting Figure S1–S16**

**Supporting Table S1–S3**

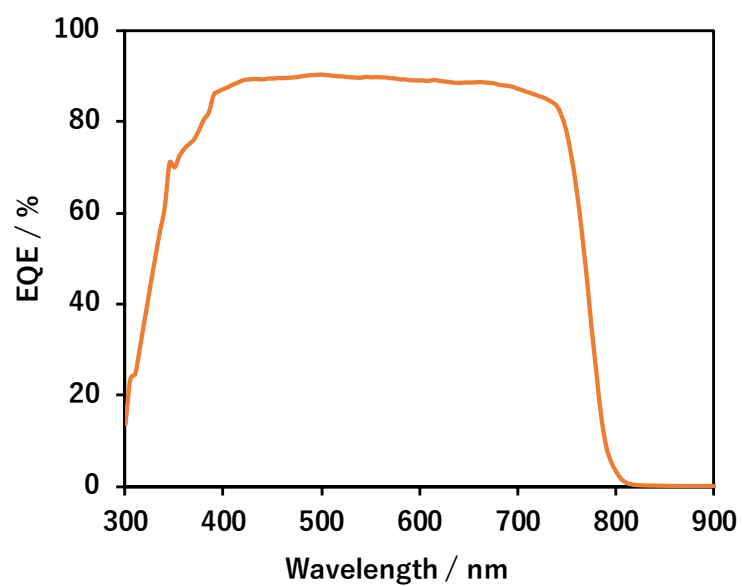

**Figure S1.** EQE spectrum of PSC (FTO/cTiO<sub>2</sub>/mpTiO<sub>2</sub>/MA<sub>0.13</sub>FA<sub>0.87</sub>PbI<sub>2.61</sub>Br<sub>0.39</sub>/doped SpiroOMeTAD/Au). The integrated  $J_{SC}$  is 22.06 mA cm<sup>-2</sup> (maximum EQE: 0.90 at ~500 nm; onset: ~815 nm).

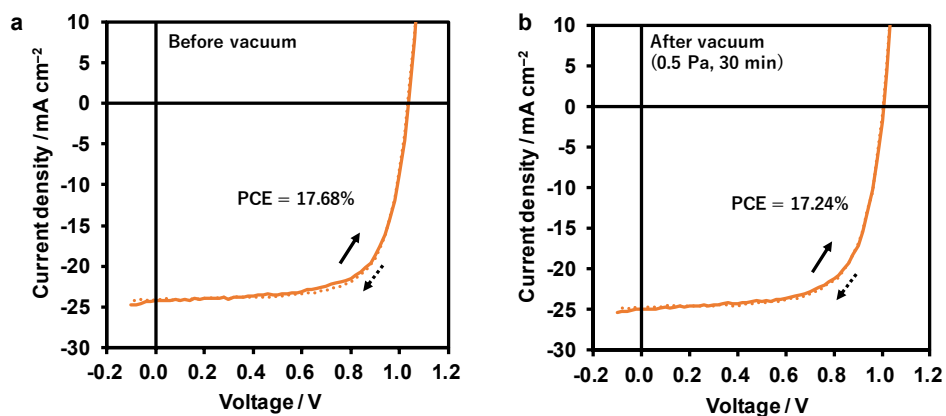

**Figure S2.** Best-performing  $JV$  curves of PSC (FTO/cTiO<sub>2</sub>/mpTiO<sub>2</sub>/MA<sub>0.13</sub>FA<sub>0.87</sub>PbI<sub>2.61</sub>Br<sub>0.39</sub>/doped SpiroOMeTAD/Au) (a) before and (b) after keeping the devices in vacuum (0.5 Pa) for 30 min similar to the EB exposure condition. Note that EB is not exposed.

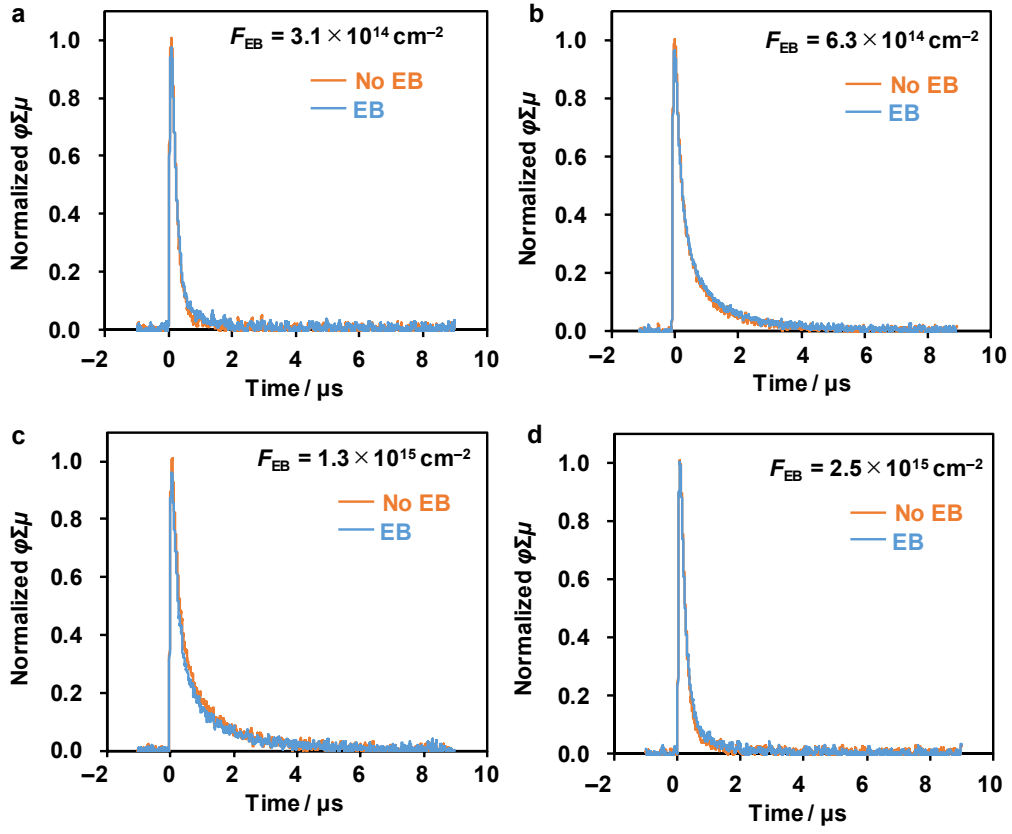

**Figure S3.** TRMC transients of  $MA_{0.13}FA_{0.87}PbI_{2.61}Br_{0.39}$  ( $\lambda_{ex} = 500$  nm) without (the orange curve) and with 100 keV EB exposure (the blue curve). They are normalized by the  $\phi \Sigma \mu_{max}$  without EB exposure. The total fluences ( $F_{EB}$ ) are (a)  $3.1 \times 10^{14} \text{ cm}^{-2}$ , (b)  $6.3 \times 10^{14} \text{ cm}^{-2}$ , (c)  $1.3 \times 10^{15} \text{ cm}^{-2}$ , and (d)  $2.5 \times 10^{15} \text{ cm}^{-2}$ .

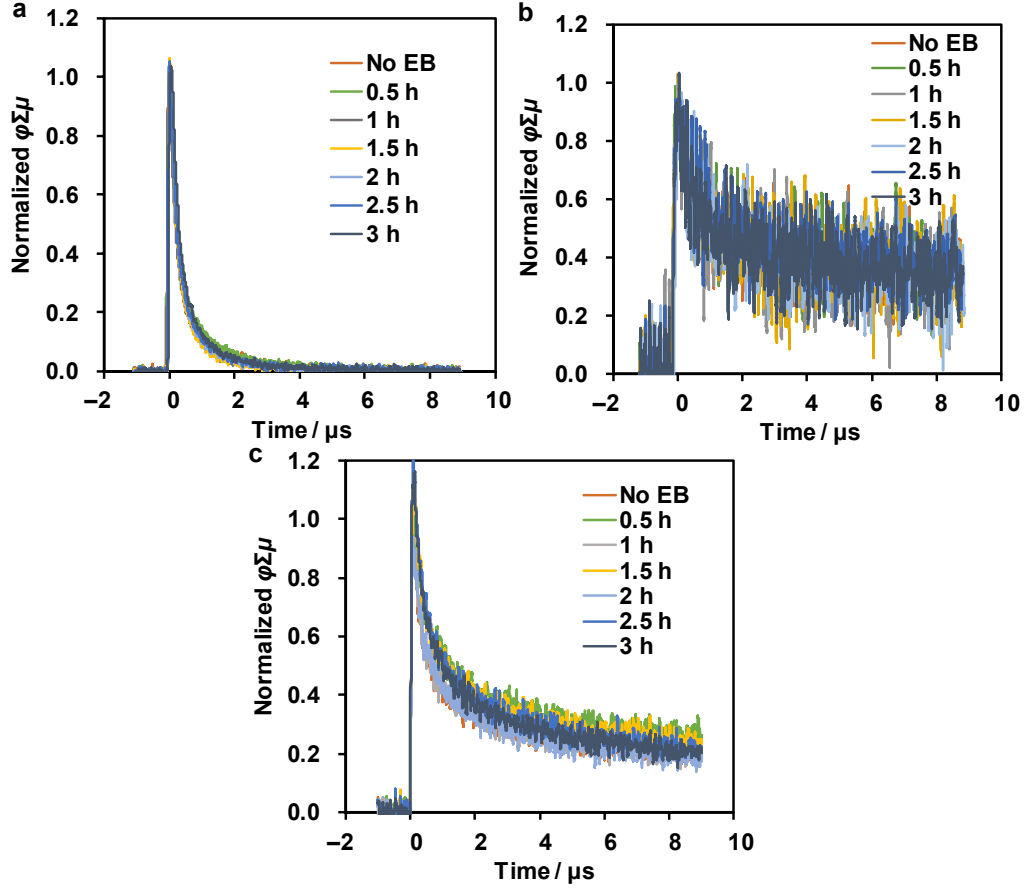

**Figure S4.** TRMC transients of (a) MA<sub>0.13</sub>FA<sub>0.87</sub>PbI<sub>2.61</sub>Br<sub>0.39</sub> ( $\lambda_{\text{ex}} = 500$  nm), (b) doped SpiroOMeTAD ( $\lambda_{\text{ex}} = 355$  nm), and (c) mpTiO<sub>2</sub> ( $\lambda_{\text{ex}} = 355$  nm) normalized by the  $\phi\Sigma\mu_{\text{max}}$  (the orange curve) without 100 keV EB exposure at  $2.5 \times 10^{15} \text{ cm}^{-2}$ . Each line is the TRMC decay measured after the EB exposure (0.5 to 3 h).

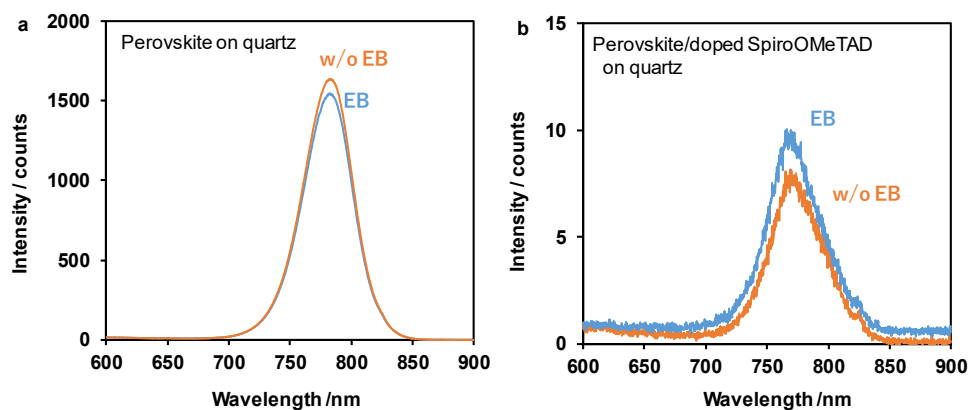

**Figure S5.** Photoluminescence (PL) spectra of (a)  $\text{MA}_{0.13}\text{FA}_{0.87}\text{PbI}_{2.61}\text{Br}_{0.39}$  with (blue line) and without (orange line) EB exposure ( $100 \text{ keV}$  at  $2.5 \times 10^{15} \text{ cm}^{-2}$ ) and (b) the perovskite/ doped SpiroOMeTAD with/without EB exposure. All of the PL spectra were measured under the same condition (slit width, etc,  $\lambda_{\text{ex}} = 400 \text{ nm}$ ).

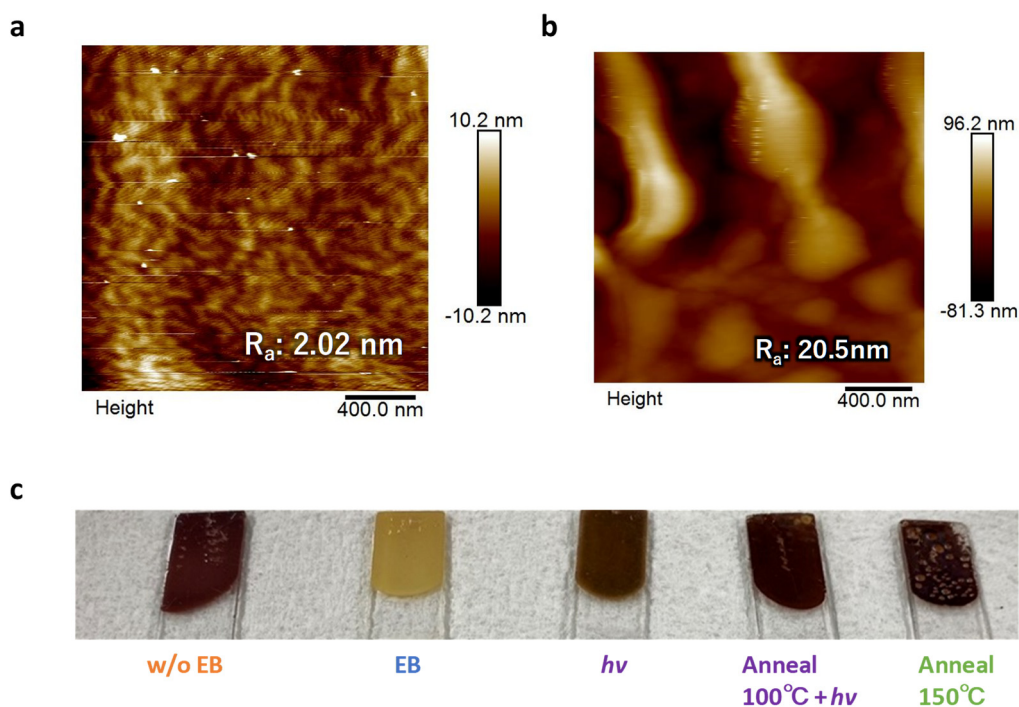

**Figure S6.** (a) AFM height image of the doped SpiroOMeTAD film after thermal annealing at 100 °C for 20 min with AM1.5G exposure. (b) AFM height image of the doped SpiroOMeTAD film after thermal annealing at 150 °C for 20 min. The roughness value is appended. (c) Pictures of doped SpiroOMeTAD films. From the left to the right, without EB exposure, EB (100 keV,  $2.5 \times 10^{15} \text{ cm}^{-2}$ ), the AM1.5G exposure for 20 min, thermal annealing at 100 °C with AM1.5G exposure, and thermal annealing at 150 °C with AM1.5G exposure. All of the films except for w/o EB were exposed to EB.

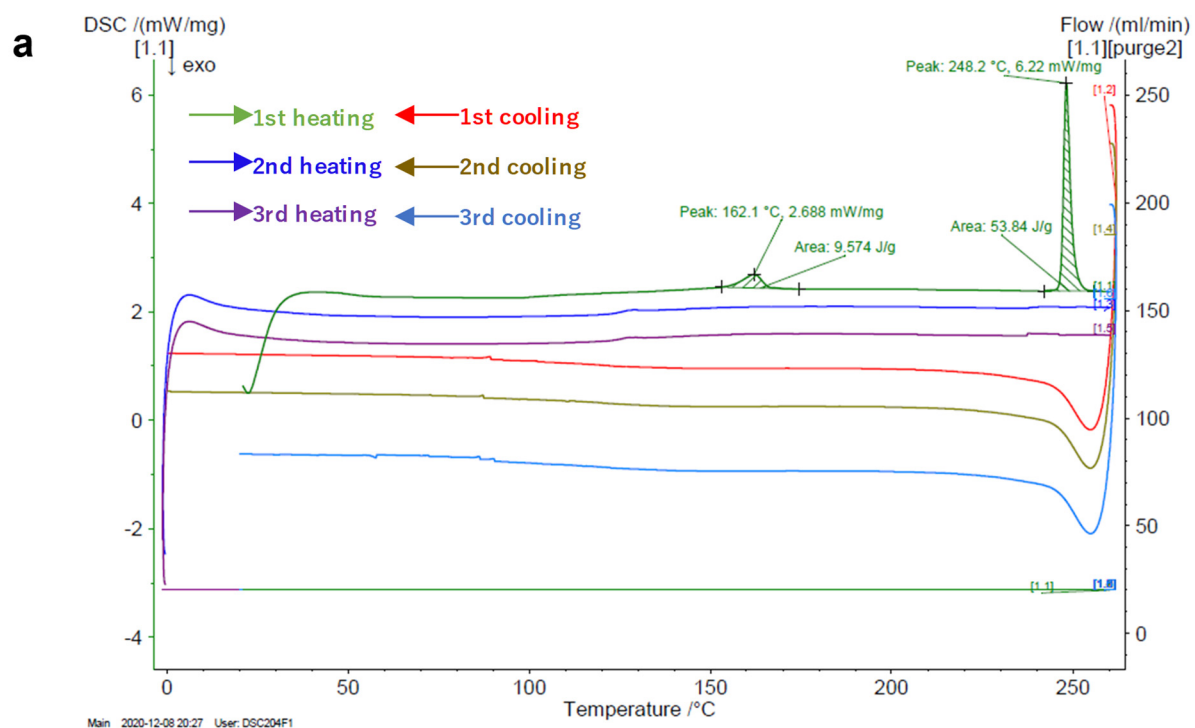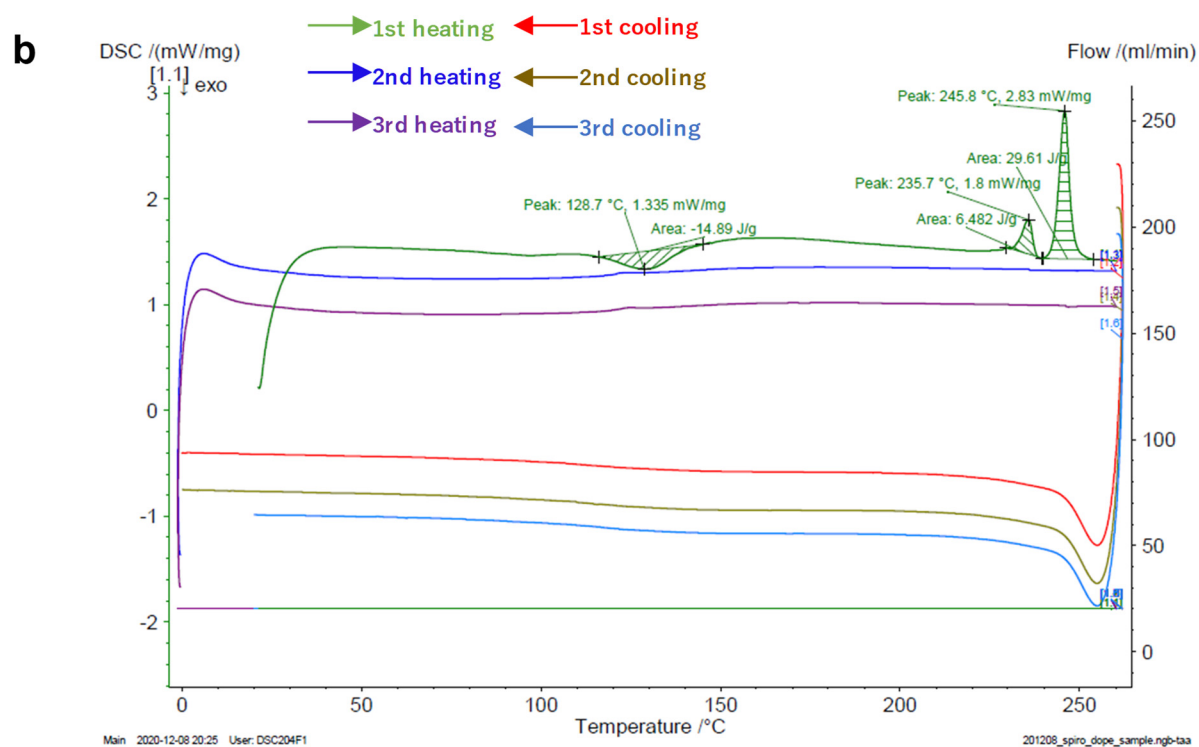

**Figure S7.** DSC charts of (a) SpiroOMeTAD and (b) doped SpiroOMeTAD.



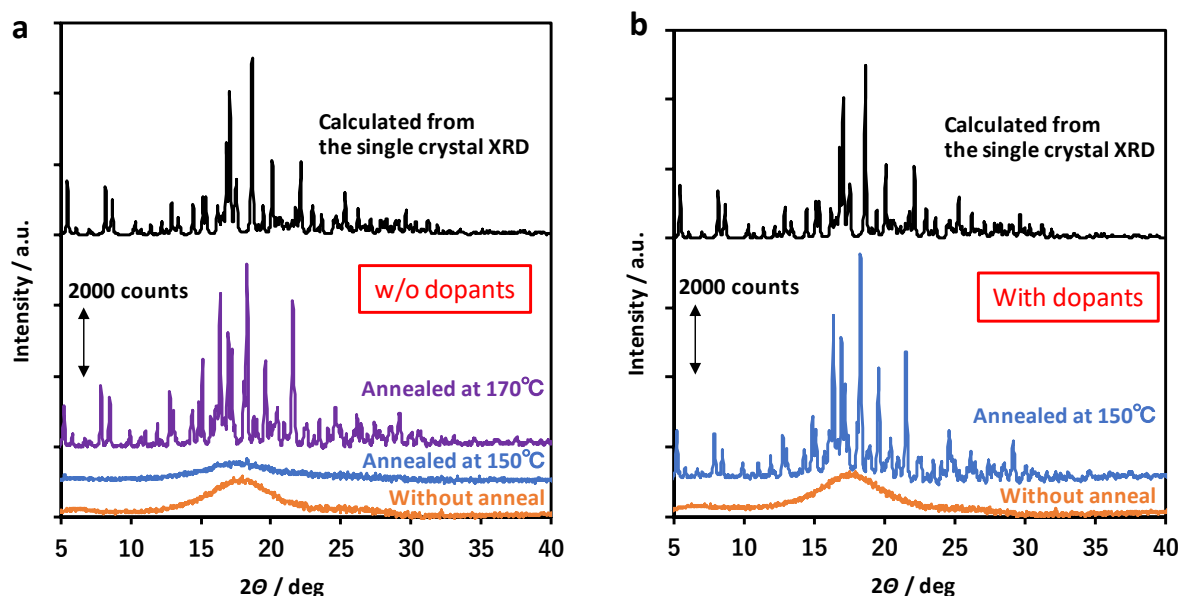

**Figure S8.** XRD profiles of (a) SpiroOMeTAD and (b) doped SpiroOMeTAD. The background (a broad diffraction ascribed to a quartz substrate) was subtracted. The black line is calculated from the single crystal XRD data in the literature (Shi, D.; Qin, X.; Li, Y.; He, Y.; Zhong, C.; Pan, J.; Dong, H.; Xu, W.; Li, T.; Hu, W.; Brédas, J. -L.; Bakr, O. M. Spiro-OMeTAD Single Crystals: Remarkably Enhanced Charge-Carrier Transport via Mesoscale Ordering. *Sci. Adv.* **2016**, 2, e1501491.).

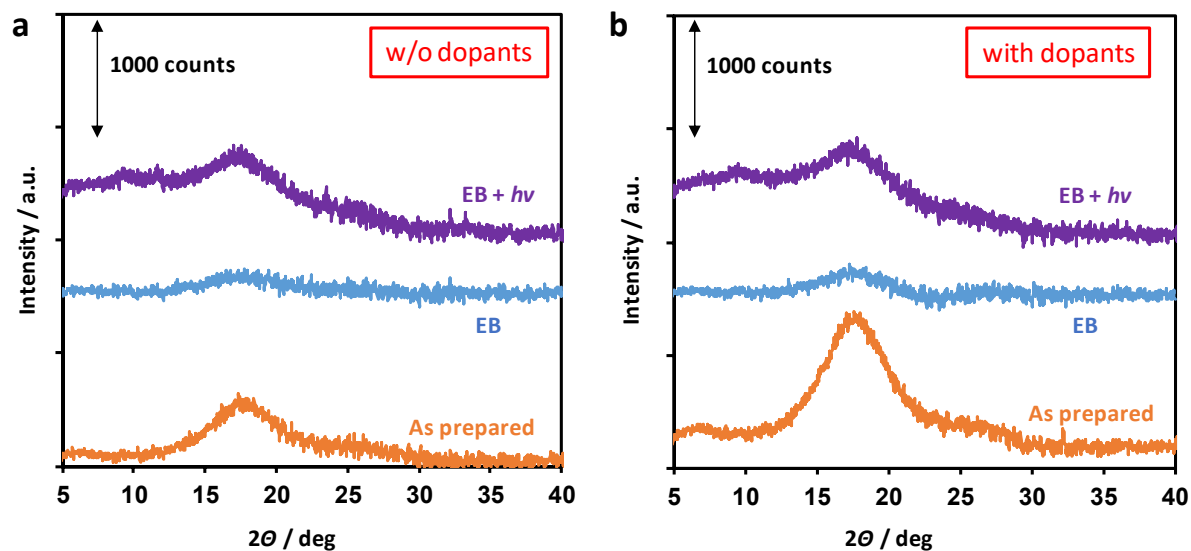

**Figure S9.** XRD profiles of (a) SpiroOMeTAD and (b) doped SpiroOMeTAD. The background (a broad diffraction ascribed to a quartz substrate) was subtracted. The orange, blue, and purple lines are as prepared, EB (100 keV,  $2.5 \times 10^{15} \text{ cm}^{-2}$ )-exposed, and the light (AM1.5G, 100 mW  $\text{cm}^{-2}$  for 20 min)-treated after the EB films, respectively.

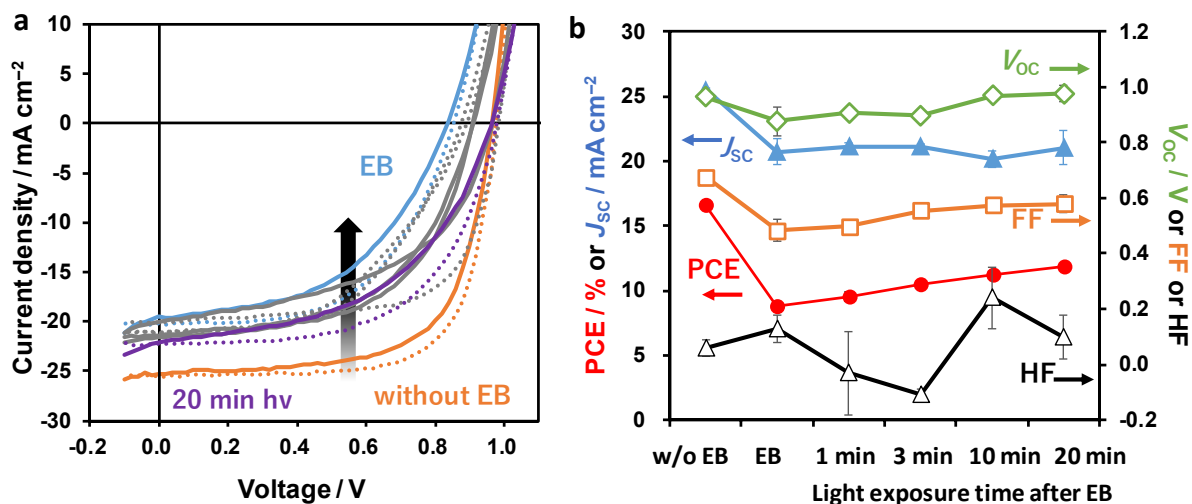

**Figure S10.** (a)  $JV$  curves of PSC devices without EB (orange line), after  $100 \text{ keV } 2.5 \times 10^{15} \text{ cm}^{-2}$  EB exposure (blue line), AM1.5G  $100 \text{ mW cm}^{-2}$  light exposure (gray lines), and after 20 min light exposure (purple line). The solid and dotted lines are forward and reverse scans, respectively. (b) PCE,  $J_{sc}$ ,  $V_{oc}$ , FF, and hysteresis factor (HF) without EB, EB, and light exposure.

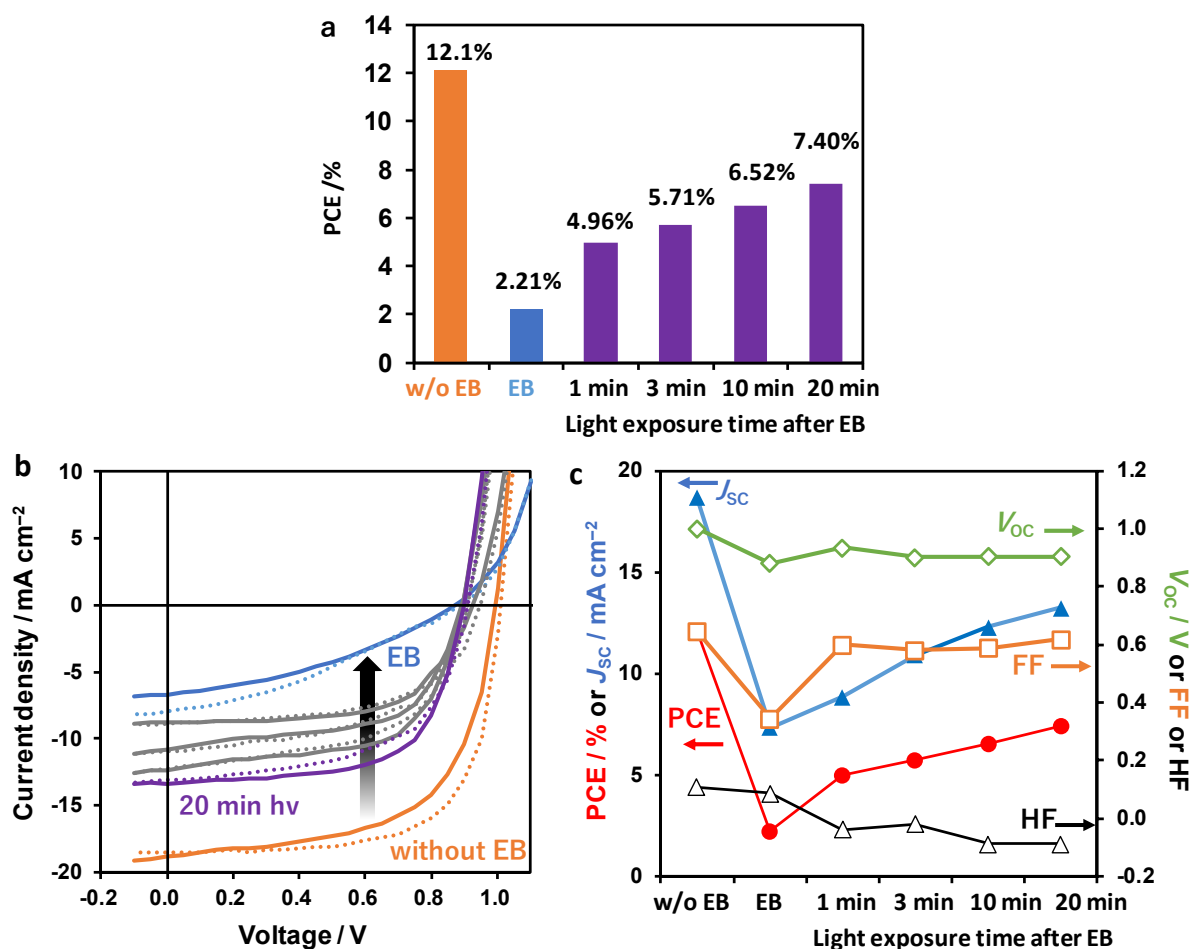

**Figure S11.** (a) PCE change of EB exposure and light treated PSC device. Note that this is the case for the low PCE device. (b)  $JV$  curves of PSC devices without EB (orange line), after 100 keV  $2.5 \times 10^{15} \text{ cm}^{-2}$  EB exposure (blue line), AM1.5G  $100 \text{ mW cm}^{-2}$  light exposure (gray lines), and after 20 min light exposure (purple line). The solid and dotted lines are forward and reverse scans, respectively. (c) PCE,  $J_{sc}$ ,  $V_{oc}$ , FF, and hysteresis factor (HF) without EB, EB, and light exposure.

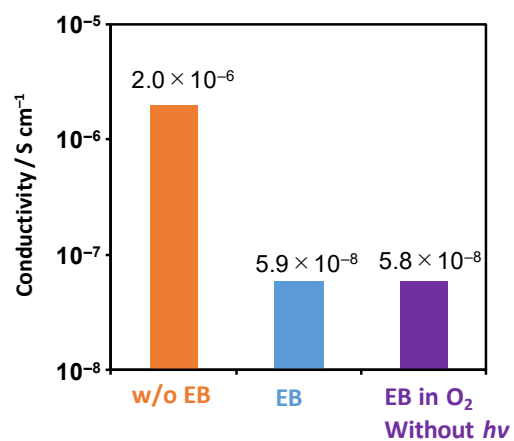

**Figure S12.** Steady-state conductivity of a SpiroOMeTAD without EB exposure (orange bar), after EB (100 keV,  $2.5 \times 10^{15} \text{ cm}^{-2}$ ) exposure (blue bar), and after the EB exposure and keeping in O<sub>2</sub> for 12 h without light exposure (purple bar).

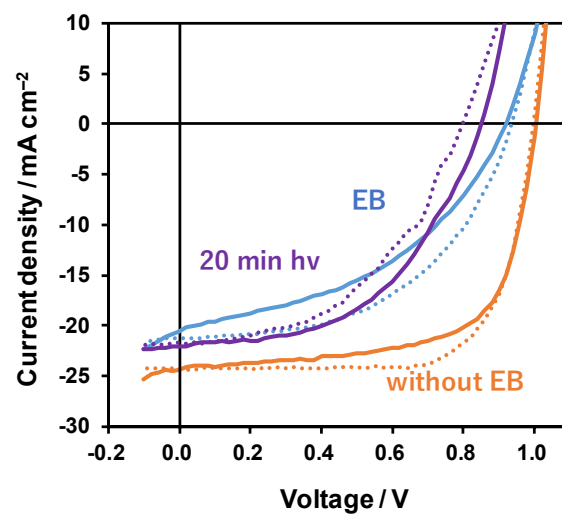

**Figure S13.**  $JV$  curves of PSC devices without EB (orange line), after 100 keV  $2.5 \times 10^{15} \text{ cm}^{-2}$  EB exposure (blue line), and AM1.5G  $100 \text{ mW cm}^{-2}$  light exposure (purple line) under the short circuit condition for 20 min. The solid and dotted lines are forward and reverse scans, respectively.

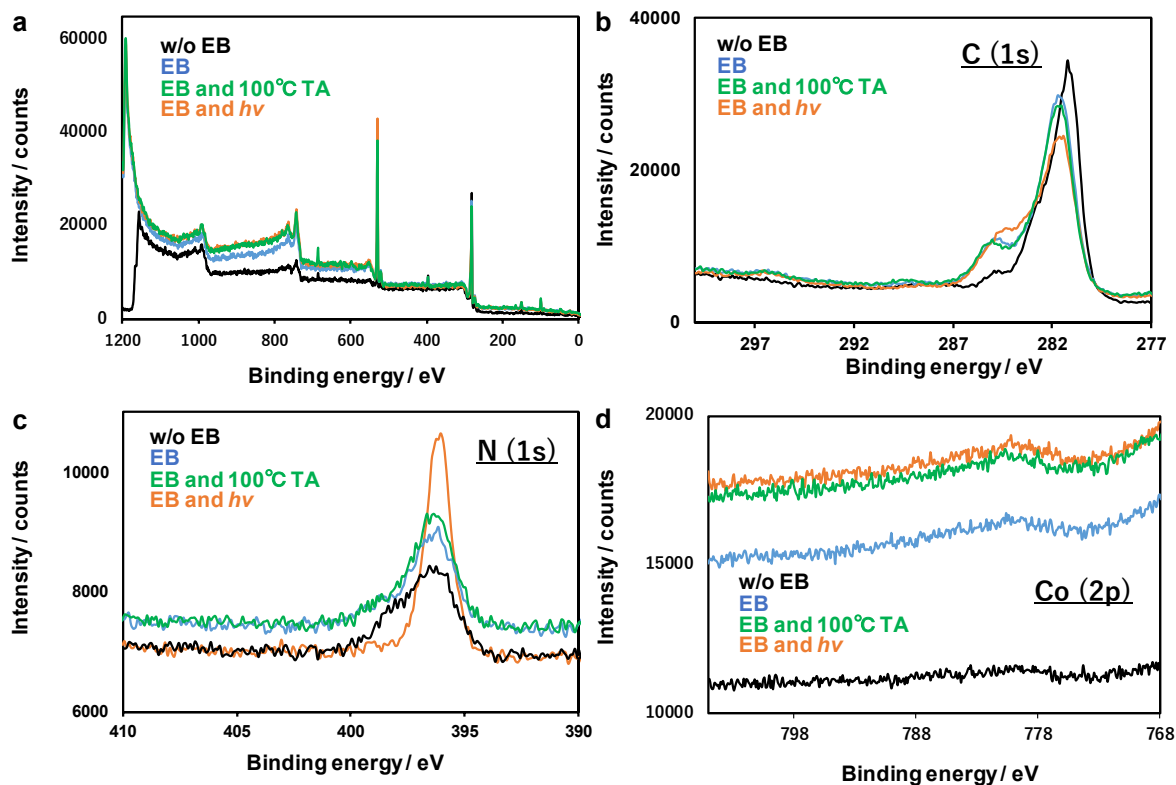

**Figure S14.** XPS spectra of doped SpiroOMeTAD without EB (black line), EB (blue line, 100 keV,  $2.5 \times 10^{15} \text{ cm}^{-2}$ ), EB with 100 °C thermal annealing (green line), and EB with the light treatment ( $h\nu$ : the pseudo sunlight at 100 mW  $\text{cm}^{-2}$  for 20 min) (orange line). (a) Full spectra and magnified plots at (b) C (1s) peak, (c) N (1s) peak, and (d) Co (2p).

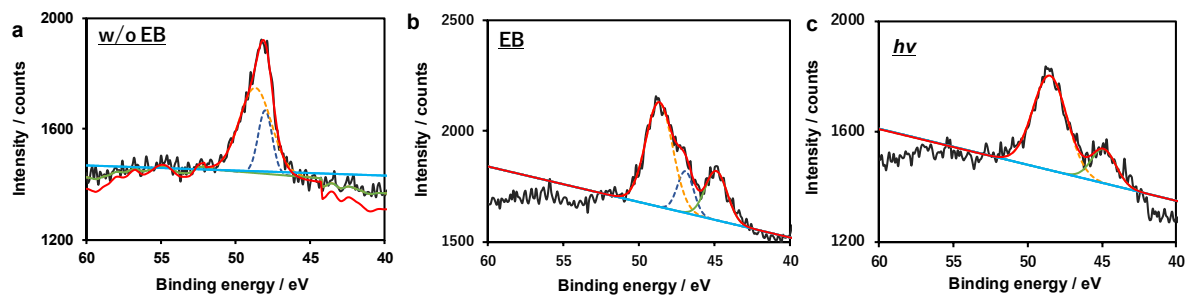

**Figure S15.** Fitting of XP spectra of doped SpiroOMeTAD (a) without EB, (b) EB (100 keV,  $2.5 \times 10^{15} \text{ cm}^{-2}$ ), and (c) EB with the light treatment ( $h\nu$ : the pseudo sunlight at  $100 \text{ mW cm}^{-2}$  for 20 min).



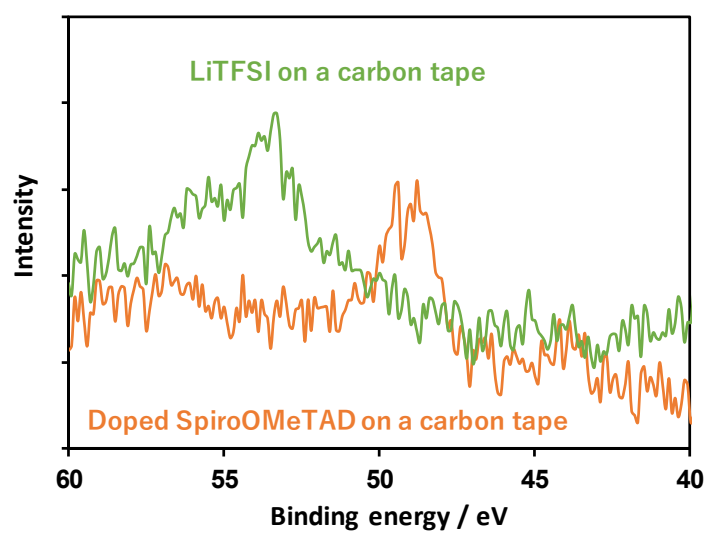

**Figure S16.** XP spectra of doped SpiroOMeTAD and LiTFSI powder on a carbon tape.

**Table S1.** Summary of perovskite solar cell before and after keeping in vacuum (0.5 Pa) for 30 min.<sup>a</sup>

| Vacuum | PCE /%                | $J_{sc}$<br>/mA cm <sup>-2</sup> | $V_{oc}$ /V            | FF                     | HF <sup>b</sup>     | # of<br>devices |
|--------|-----------------------|----------------------------------|------------------------|------------------------|---------------------|-----------------|
| Before | 16.23±1.06<br>(17.68) | 23.53±1.26<br>(24.17)            | 1.021±0.017<br>(1.037) | 0.675±0.015<br>(0.694) | 0.04±0.1<br>(0.02)  | 5               |
| After  | 15.98±0.79<br>(17.24) | 24.06±0.56<br>(25.01)            | 1.016±0.007<br>(1.006) | 0.654±0.031<br>(0.676) | 0.08±0.09<br>(0.01) | 5               |

<sup>a</sup> The values in brackets are the maximum value. <sup>b</sup> hysteresis factor: [reverse – forward]/reverse.**Table S2.** Summary of perovskite solar cell performance upon EB exposure (100 keV,  $2.5 \times 10^{15}$  cm<sup>-2</sup>) and the light (AM1.5G, 100 mW cm<sup>-2</sup>) treatment in O<sub>2</sub>.

|        | PCE /%     | $J_{sc}$<br>/mA cm <sup>-2</sup> | $V_{oc}$ / V | FF          | HF <sup>a</sup> | # of<br>devices |
|--------|------------|----------------------------------|--------------|-------------|-----------------|-----------------|
| w/o EB | 16.64±0.20 | 25.55±0.15                       | 0.963±0.007  | 0.676±0.011 | 0.06±0.03       | 3               |
| EB     | 8.76±0.14  | 20.73±1.03                       | 0.878±0.052  | 0.483±0.039 | 0.13±0.05       | 3               |
| 1 min  | 9.57±0.37  | 21.14±0.24                       | 0.908±0.017  | 0.498±0.022 | -0.03±0.15      | 3               |
| 3 min  | 10.51±0.12 | 21.14±0.17                       | 0.896±0.003  | 0.554±0.006 | -0.11±0.02      | 3               |
| 10 min | 11.23±0.29 | 20.18±0.61                       | 0.968±0.005  | 0.575±0.012 | 0.24±0.11       | 3               |
| 20 min | 11.84±0.16 | 21.04±1.36                       | 0.976±0.030  | 0.578±0.032 | 0.10±0.08       | 3               |

<sup>a</sup> hysteresis factor: [reverse – forward]/reverse.**Table S3.** Summary of perovskite solar cell performance upon EB exposure (100 keV,  $2.5 \times 10^{15}$  cm<sup>-2</sup>) and the light (AM1.5G, 100 mW cm<sup>-2</sup>) treatment under the short circuit condition in O<sub>2</sub>

|        | PCE /%     | $J_{sc}$<br>/mA cm <sup>-2</sup> | $V_{oc}$ / V | FF          | HF <sup>a</sup> | # of<br>devices |
|--------|------------|----------------------------------|--------------|-------------|-----------------|-----------------|
| w/o EB | 16.66±0.16 | 24.43±0.38                       | 0.982±0.016  | 0.694±0.004 | 0.05±0.03       | 3               |
| EB     | 8.90±0.35  | 21.03±0.41                       | 0.892±0.070  | 0.475±0.012 | 0.19±0.08       | 3               |
| 20 min | 8.83±0.03  | 21.61±0.42                       | 0.846±0.040  | 0.483±0.013 | -0.10±0.09      | 3               |

<sup>a</sup> hysteresis factor: [reverse – forward]/reverse.
